# Supplementary material for: Exposure to Veterinary Antibiotics via Food Chain Disrupts Gut Microbiota and Drives Increased Escherichia coli Virulence and Drug Resistance in Young Adults
Source: MDPI journal article supplement (doi:10.3390/pathogens11091062), 2022-09-18
Supplement: s1 [file s1]

Table S2: primers used in this study

| Gene's name      | Primer sequence (5' to 3')                                  |
|------------------|-------------------------------------------------------------|
| <i>aac(3)-IV</i> | F: CTTCAGGATGGCAAGTTGGT<br>R: TCATCTCGTTCTCCGCTCAT          |
| <i>cat-A1</i>    | F: AGTTGCTCAATGTACCTATATAACC<br>R: TTGTAATTCATTAAGCATTCTGCC |
| <i>cml-A</i>     | F: CCGCCACGGTGTGTGTTGTTATC<br>R: CACCTTGCCTGCCCATCATTAG     |
| <i>qnr-A</i>     | F: AGAGGATTTCTCACGCCAGG<br>R: TGCCAGGCACAGATCTTGAC          |
| <i>qnr-B</i>     | F: GGMATHGAAATTCGCCACTG<br>R: TTTGCYGYTCGCCAGTCGAA          |
| <i>qnr-S</i>     | F: ACGACATTCGTCAACTGCAA<br>R: TAAATTGGCACCCCTGTAGGC         |
| <i>tet-A</i>     | F: TTGGCATTCTGCATTCACTCG<br>R: CCACCCGTTCCACGTTGTT          |
| <i>tet-B</i>     | F: TTCACCGCATAGTCCCTT<br>R: TGCAATAAATCCGAGCAG              |
| <i>CTX-M</i>     | F: CGCTTTGCGATGTGCAG<br>R: ACCGCGATATCGTTGGT                |
| <i>CTX-M-1</i>   | F: GCTGTTGTTAGGAAGTGTGCCGC<br>R: GCCGCCGACGCTAATACATC       |
| <i>OXY</i>       | F: GGTTTTGGTAACTGTGACGGG<br>R: CAGAGTGCAGAGTGTTCAG          |
| <i>TEM-1</i>     | F: ATAAAATTCTTGAAGACGAAA<br>R: GACAGTTACCAATGCTTAATC        |
| <i>MdtB</i>      | F: TCTTCCCGGTACAGGACAAT<br>R: CATCAACGCCAACAAATGAG          |
| <i>MdtF</i>      | F: CCGTACCGGTGGTTATTCTC<br>R: ATCGATTTATGCGTCGCTTC          |
| <i>MdtG</i>      | F: CGGTATTGTCTTCAGCATTACATTTT<br>R: GGCGAGTCCACCCCAA        |
| <i>MdtL</i>      | F: TATCCCGCCGGGATTGATAT<br>R: CGCTTCGCTGGCATTGA             |
| <i>iutA</i>      | F: GGCTGGACATGGGAAGTGG<br>R: CGTCGGGAACGGGTAGAATCG          |
| <i>cvaC</i>      | F: CACACACAAACGGGAGCTGTT<br>R: CACACACAAACGGGAGCTGTT        |
| <i>iss</i>       | F: ATCACATAGGATTCTGCCG<br>R: ACAAAAAGTTCTATCGCTTCC          |
| <i>tsh</i>       | F: GGTGGTGCAGTGGAGTGG<br>R: AGTCCAGCGTGATAGTGG              |
| <i>papC</i>      | F: GACGGCTGTACTGCAGGGTGTGGCG                                |

|                |                                      |
|----------------|--------------------------------------|
|                | R: ATATCCTTTCTGCAGGGATGCAATA         |
| <i>kps</i>     | F: GCGCATTTGCTGATCGTTG               |
|                | R: CATCCAGACGATAAGCATGAGCA           |
| <i>Iha</i>     | F: CTGGCGGAGGCTCTGAGATCA             |
|                | R: TCCTTAAGCTCCCGCGGCTGA             |
| <i>E. coli</i> | F: TACCCCGAGGAAAAGAAATCAACC          |
|                | R: CACACACTGATTCAGGCTCTGG            |
| Taqman Probe   | FAM 5' CCCGTTGCTCGCCGCTACTGG 3' BHQ1 |
