# Supplementary material for: Exposure to Veterinary Antibiotics via Food Chain Disrupts Gut Microbiota and Drives Increased Escherichia coli Virulence and Drug Resistance in Young Adults
Source: MDPI journal article supplement (doi:10.3390/pathogens11091062), 2022-09-18
Supplement: s1 [file s1]

Table S1 Baseline characteristics of study participants

|        | Gender %        | Age (year)      | BMI kg/cm <sup>2</sup> |
|--------|-----------------|-----------------|------------------------|
|        | (Prevalence)    | (mean $\pm$ SD) | (mean $\pm$ SD)        |
| Male   | 53.3% (160/300) | 21.4 $\pm$ 0.7  | 20.8 $\pm$ 2.3         |
| Female | 46.7% (140/300) | 21.9 $\pm$ 0.7  | 22.0 $\pm$ 2.9         |
