# Supplementary material for: Exposure to Veterinary Antibiotics via Food Chain Disrupts Gut Microbiota and Drives Increased Escherichia coli Virulence and Drug Resistance in Young Adults
Source: Pathogens. 2022 Sep 18;11(9):1062. doi: 10.3390/pathogens11091062 (PMC9500718; doi:10.3390/pathogens11091062)
Supplement: Supplementary file 1 [file pathogens-11-01062-s001.zip]

Archive with 6 entries (6 files):
- Figure S1.pdf
- Figure S2.pdf
- Table S1.pdf
- Table S2.pdf
- Table S3  up-regulated genes.xlsx
- Table S4 down-regulated genes.xlsx
