# Supplementary material for: Exposure to Veterinary Antibiotics via Food Chain Disrupts Gut Microbiota and Drives Increased Escherichia coli Virulence and Drug Resistance in Young Adults
Source: Pathogens. 2022 Sep 18;11(9):1062. doi: 10.3390/pathogens11091062 (PMC9500718; doi:10.3390/pathogens11091062)
Supplement: Supplementary file 1 [file pathogens-11-01062-s001.zip › Table S3 up-regulated genes.xlsx]

## Sheet: Sheet1
id	fold Change	p val	Chromosome	GO	KEGG	NR Description
gene-b3115	7.29298	2.71638e-16	gi|556503834|ref|NC_000913.3|	GO:0019665;GO:0005622;GO:0046872;GO:0008980;GO:0005524;GO:0016310;GO:0070689;GO:0008776	K00932	sp|P11868|TDCD_ECOLI Propionate kinase OS=Escherichia coli (strain K12) GN=tdcD PE=1 SV=3
gene-b3114	6.80225	2.97435e-15	gi|556503834|ref|NC_000913.3|	GO:0005975;GO:0008861;GO:0043875;GO:0016829;GO:0016020;GO:0005829;GO:0070689	K00656	sp|P42632|TDCE_ECOLI PFL-like enzyme TdcE OS=Escherichia coli (strain K12) GN=tdcE PE=1 SV=2
gene-b3117	6.54835	1.40895e-14	gi|556503834|ref|NC_000913.3|	-	K01754	sp|P0AGF9|TDCB_SHIFL L-threonine dehydratase catabolic TdcB OS=Shigella flexneri GN=tdcB PE=3 SV=1
gene-b3113	7.27835	1.50806e-14	gi|556503834|ref|NC_000913.3|	GO:0042802;GO:0008760;GO:0019239;GO:0016787;GO:0070689	K09022	sp|P0AGL4|TDCF_SHIFL Putative reactive intermediate deaminase TdcF OS=Shigella flexneri GN=tdcF PE=3 SV=1
gene-b3116	5.88349	1.13042e-12	gi|556503834|ref|NC_000913.3|	GO:0005887;GO:0003333;GO:0015565;GO:0015295;GO:0015825;GO:0015194;GO:0015992;GO:0015826	K03838	sp|Q3YXB3|TDCC_SHISS Threonine/serine transporter TdcC OS=Shigella sonnei (strain Ss046) GN=tdcC PE=3 SV=1
gene-b4471	5.92695	4.61423e-12	gi|556503834|ref|NC_000913.3|	GO:0006094;GO:0046872;GO:0051539;GO:0070689;GO:0003941	K01752	sp|P42630|TDCG_ECOLI L-serine dehydratase TdcG OS=Escherichia coli (strain K12) GN=tdcG PE=1 SV=4
gene-b4131	5.30978	2.74817e-10	gi|556503834|ref|NC_000913.3|	GO:0005737;GO:0042802;GO:0006554;GO:0008923	K01582	sp|P0A9H3|LDCI_ECOLI Lysine decarboxylase, inducible OS=Escherichia coli (strain K12) GN=cadA PE=1 SV=1
gene-b0615	7.04172	8.97035e-10	gi|556503834|ref|NC_000913.3|	GO:0006084;GO:0008815;GO:0008814;GO:0009346	K01643	sp|P75726|CILA_ECOLI Citrate lyase alpha chain OS=Escherichia coli (strain K12) GN=citF PE=2 SV=1
gene-b0616	7.14329	4.48797e-09	gi|556503834|ref|NC_000913.3|	GO:0006084;GO:0046872;GO:0008815;GO:0008816;GO:0009346	K01644	sp|P0A9I1|CITE_ECOLI Citrate lyase subunit beta OS=Escherichia coli (strain K12) GN=citE PE=2 SV=1
gene-b3708	4.42316	7.63905e-09	gi|556503834|ref|NC_000913.3|	GO:0005829;GO:0055114;GO:0030955;GO:0080146;GO:0009034;GO:0051213;GO:0042802;GO:0060187;GO:0006569;GO:0030170;GO:0016020	K01667	sp|P0A854|TNAA_SHIFL Tryptophanase OS=Shigella flexneri GN=tnaA PE=3 SV=1
gene-b3510	4.19897	8.89555e-08	gi|556503834|ref|NC_000913.3|	GO:0071468;GO:0033554;GO:0030288	K19777	sp|P0AET1|HDEA_SHIFL Acid stress chaperone HdeA OS=Shigella flexneri GN=hdeA PE=3 SV=1
gene-b3078	5.27233	3.49298e-07	gi|556503834|ref|NC_000913.3|	GO:1902475;GO:0005887;GO:0015179;GO:0015297	-	sp|P42590|YGJI_ECOLI Inner membrane transporter YgjI OS=Escherichia coli (strain K12) GN=ygjI PE=1 SV=2
gene-b3707	4.20458	4.11692e-07	gi|556503834|ref|NC_000913.3|	-	-	sp|P0AD89|LPTN_ECOLI Tryptophanase leader peptide OS=Escherichia coli (strain K12) GN=tnaL PE=4 SV=1
gene-b3509	4.14233	5.62462e-07	gi|556503834|ref|NC_000913.3|	GO:0009268;GO:0033554;GO:0042597;GO:0051082	K19778	sp|P0AET4|HDEB_SHIFL Acid stress chaperone HdeB OS=Shigella flexneri GN=hdeB PE=3 SV=1
gene-b0612	4.48672	2.15301e-06	gi|556503834|ref|NC_000913.3|	GO:0016021;GO:0015297;GO:0006814;GO:0005886;GO:0055085	K09477	sp|P0AE74|CITT_ECOLI Citrate carrier OS=Escherichia coli (strain K12) GN=citT PE=1 SV=1
gene-b3076	3.59165	3.60555e-06	gi|556503834|ref|NC_000913.3|	GO:0030246;GO:0005990;GO:0004565;GO:0009341	K12111	sp|P06864|BGA2_ECOLI Evolved beta-galactosidase subunit alpha OS=Escherichia coli (strain K12) GN=ebgA PE=1 SV=4
gene-b3118	3.39452	6.98175e-06	gi|556503834|ref|NC_000913.3|	GO:0045893;GO:0000986;GO:0070689;GO:0005737;GO:0003700	K07592	sp|P0ACQ9|TDCA_SHIFL HTH-type transcriptional regulator TdcA OS=Shigella flexneri GN=tdcA PE=3 SV=1
gene-b2455	4.07156	9.43208e-06	gi|556503834|ref|NC_000913.3|	GO:0004029;GO:0046336;GO:0055114;GO:0001758	K04021	sp|P77445|EUTE_ECOLI Ethanolamine utilization protein EutE OS=Escherichia coli (strain K12) GN=eutE PE=4 SV=1
gene-b4132	4.73667	1.24327e-05	gi|556503834|ref|NC_000913.3|	GO:1903401;GO:0043872;GO:0015295;GO:0015839;GO:0005887;GO:0015992	K03757	sp|P0AAE8|CADB_ECOLI Probable cadaverine/lysine antiporter OS=Escherichia coli (strain K12) GN=cadB PE=2 SV=1
gene-b4240	3.41631	1.84424e-05	gi|556503834|ref|NC_000913.3|	GO:0005887;GO:0034219;GO:0016301;GO:0103111;GO:0016310;GO:0015771;GO:0009401;GO:0015574;GO:0090589;GO:0008982	K02819	sp|P36672|PTTBC_ECOLI PTS system trehalose-specific EIIBC component OS=Escherichia coli (strain K12) GN=treB PE=1 SV=4
gene-b4035	3.22439	2.35067e-05	gi|556503834|ref|NC_000913.3|	GO:0015423;GO:0055085;GO:1990060;GO:0033613;GO:0005524;GO:0015609;GO:0008152;GO:0015768;GO:0042956;GO:0031234	K10111	sp|Q3YUV0|MALK_SHISS Maltose/maltodextrin import ATP-binding protein MalK OS=Shigella sonnei (strain Ss046) GN=malK PE=3 SV=1
gene-b3506	3.35688	2.64695e-05	gi|556503834|ref|NC_000913.3|	GO:0042802;GO:0009279	K07285	sp|P37194|SLP_ECOLI Outer membrane protein slp OS=Escherichia coli (strain K12) GN=slp PE=1 SV=1
gene-b4034	3.01821	2.87118e-05	gi|556503834|ref|NC_000913.3|	GO:1990060;GO:0030288;GO:0060326;GO:0034289;GO:0055052;GO:0005363;GO:0005515;GO:0015768;GO:0006974;GO:0042956;GO:1901982	K10108	sp|P0AEX9|MALE_ECOLI Maltose-binding periplasmic protein OS=Escherichia coli (strain K12) GN=malE PE=1 SV=1
gene-b4037	2.91031	0.00011121	gi|556503834|ref|NC_000913.3|	GO:0030288;GO:0008643	K05775	sp|P03841|MALM_ECOLI Maltose operon periplasmic protein OS=Escherichia coli (strain K12) GN=malM PE=4 SV=1
gene-b3709	2.75599	0.000115791	gi|556503834|ref|NC_000913.3|	GO:0015801;GO:0015293;GO:0015173;GO:0003333;GO:0005887;GO:0006569	K03836	sp|P23173|TNAB_ECOLI Low affinity tryptophan permease OS=Escherichia coli (strain K12) GN=tnaB PE=1 SV=1
gene-b4032	3.60318	0.000209595	gi|556503834|ref|NC_000913.3|	GO:0055052;GO:0005515;GO:0042956;GO:1990060;GO:0015768;GO:0015423	K10110	sp|P68186|MALG_SHIFL Maltose transport system permease protein MalG OS=Shigella flexneri GN=malG PE=3 SV=1
gene-b2147	2.81589	0.000232895	gi|556503834|ref|NC_000913.3|	GO:0005737;GO:0046872;GO:0006208;GO:0005515;GO:0006928;GO:0051539;GO:0055114;GO:0003954;GO:0017113;GO:0004159	K17723	sp|P25889|PREA_ECOLI NAD-dependent dihydropyrimidine dehydrogenase subunit PreA OS=Escherichia coli (strain K12) GN=preA PE=1 SV=3
gene-b2146	2.73551	0.000247898	gi|556503834|ref|NC_000913.3|	GO:0005737;GO:0006208;GO:0051536;GO:0005515;GO:0055114;GO:0003954;GO:0004159	K17722	sp|P76440|PRET_ECOLI NAD-dependent dihydropyrimidine dehydrogenase subunit PreT OS=Escherichia coli (strain K12) GN=preT PE=1 SV=1
gene-b4239	2.83266	0.000253622	gi|556503834|ref|NC_000913.3|	GO:0006974;GO:0043169;GO:0005993;GO:0005829;GO:0008788	K01226	sp|P28904|TREC_ECOLI Trehalose-6-phosphate hydrolase OS=Escherichia coli (strain K12) GN=treC PE=3 SV=3
gene-b4033	2.67918	0.000295999	gi|556503834|ref|NC_000913.3|	GO:0016021;GO:0006810;GO:0005886	K10109	sp|P02916|MALF_ECOLI Maltose transport system permease protein MalF OS=Escherichia coli (strain K12) GN=malF PE=1 SV=1
gene-b3512	2.937	0.000629974	gi|556503834|ref|NC_000913.3|	GO:0006355;GO:0003677	K21907	sp|P63207|GADE_SHIFL Transcriptional regulator GadE OS=Shigella flexneri GN=gadE PE=3 SV=1
gene-b2156	2.49669	0.000978938	gi|556503834|ref|NC_000913.3|	GO:0051260;GO:0042802;GO:0005887;GO:1902022;GO:1902475;GO:0046982;GO:0015179;GO:0015297	K11733	sp|P25737|LYSP_ECOLI Lysine-specific permease OS=Escherichia coli (strain K12) GN=lysP PE=1 SV=5
gene-b4024	2.40825	0.00104003	gi|556503834|ref|NC_000913.3|	GO:0005829;GO:0009090;GO:0009089;GO:0004072;GO:0005524;GO:0016310;GO:0016597	K00928	sp|P08660|AK3_ECOLI Lysine-sensitive aspartokinase 3 OS=Escherichia coli (strain K12) GN=lysC PE=1 SV=2
gene-b3476	2.3873	0.00126818	gi|556503834|ref|NC_000913.3|	GO:0016151;GO:0072511;GO:0030288;GO:0015413;GO:0035444;GO:0050919;GO:0043190;GO:0015833;GO:0020037;GO:0015197	K15584	sp|P33590|NIKA_ECOLI Nickel-binding periplasmic protein OS=Escherichia coli (strain K12) GN=nikA PE=1 SV=1
gene-b0618	5.61418	0.00129847	gi|556503834|ref|NC_000913.3|	GO:0008771;GO:0008080;GO:0005515;GO:0006464;GO:0009058;GO:0005524;GO:0016829	K01910	sp|P77390|CITC_ECOLI [Citrate [pro-3S]-lyase] ligase OS=Escherichia coli (strain K12) GN=citC PE=2 SV=2
gene-b4354	2.55574	0.001327	gi|556503834|ref|NC_000913.3|	GO:0009267;GO:0005887;GO:0006974	-	sp|P39396|YJIY_ECOLI Inner membrane protein YjiY OS=Escherichia coli (strain K12) GN=yjiY PE=1 SV=2
gene-b2454	3.58049	0.00149964	gi|556503834|ref|NC_000913.3|	GO:0046336;GO:0051301	K04024	sp|P77277|EUTJ_ECOLI Ethanolamine utilization protein EutJ OS=Escherichia coli (strain K12) GN=eutJ PE=4 SV=1
gene-b2871	2.21067	0.00160082	gi|556503834|ref|NC_000913.3|	-	K01751	sp|P66899|DPAL_ECOLI Putative diaminopropionate ammonia-lyase OS=Escherichia coli (strain K12) GN=ygeX PE=1 SV=1
gene-b3511	3.13695	0.00170611	gi|556503834|ref|NC_000913.3|	GO:0016021	K21908	sp|P0AET7|HDED_SHIFL Protein HdeD OS=Shigella flexneri GN=hdeD PE=3 SV=1
gene-b2721	4.58839	0.00172382	gi|556503834|ref|NC_000913.3|	GO:0051287;GO:0055114;GO:0016151;GO:0016829;GO:0048038;GO:0008137	K15830	sp|P16431|HYCE_ECOLI Formate hydrogenlyase subunit 5 OS=Escherichia coli (strain K12) GN=hycE PE=1 SV=1
gene-b2458	3.57719	0.00185457	gi|556503834|ref|NC_000913.3|	GO:0046336;GO:0009408;GO:0008959	K04020	sp|P77218|EUTD_ECOLI Ethanolamine utilization protein EutD OS=Escherichia coli (strain K12) GN=eutD PE=1 SV=1
gene-b1493	3.41474	0.00188136	gi|556503834|ref|NC_000913.3|	GO:0006536;GO:0030170;GO:0004351;GO:0016020;GO:0005829;GO:0051454	K01580	sp|P69912|DCEB_SHIFL Glutamate decarboxylase beta OS=Shigella flexneri GN=gadB PE=3 SV=1
gene-b2870	2.16692	0.00190906	gi|556503834|ref|NC_000913.3|	GO:0004585;GO:0042450;GO:0000050;GO:0004070;GO:0006207;GO:0016597;GO:0005737	-	sp|Q46803|YGEW_ECOLI Uncharacterized protein YgeW OS=Escherichia coli (strain K12) GN=ygeW PE=1 SV=2
gene-b0972	2.59334	0.00221833	gi|556503834|ref|NC_000913.3|	GO:0046872;GO:0033748;GO:0009375;GO:0005886;GO:0008901;GO:0051539;GO:0016021;GO:0055114;GO:0051538	K06282	sp|Q83RW9|MBHS_SHIFL Hydrogenase-1 small chain OS=Shigella flexneri GN=hyaA PE=3 SV=2
gene-b2725	6.24114	0.00279425	gi|556503834|ref|NC_000913.3|	GO:0006355;GO:0016829	K15833	sp|P0AEV6|HYCA_SHIFL Formate hydrogenlyase regulatory protein HycA OS=Shigella flexneri GN=hycA PE=3 SV=1
gene-b2457	3.03569	0.0028863	gi|556503834|ref|NC_000913.3|	GO:0031471;GO:0090502;GO:0004525;GO:0046336;GO:0005198	K04027	sp|P0ABF4|EUTM_ECOLI Ethanolamine utilization protein EutM OS=Escherichia coli (strain K12) GN=eutM PE=1 SV=1
gene-b1819	2.05371	0.00312105	gi|556503834|ref|NC_000913.3|	GO:0005887;GO:0022870;GO:0034219;GO:0103111;GO:0032445;GO:0015764;GO:0009401;GO:0015761;GO:0061490	K02796	sp|P69806|PTND_ECOL6 Mannose permease IID component OS=Escherichia coli O6:H1 (strain CFT073 / ATCC 700928 / UPEC) GN=manZ PE=3 SV=1
gene-b2923	2.17387	0.00317723	gi|556503834|ref|NC_000913.3|	GO:0005887;GO:1903826;GO:1902023;GO:0015181	K06895	sp|P11667|ARGO_ECOLI Arginine exporter protein ArgO OS=Escherichia coli (strain K12) GN=argO PE=1 SV=2
gene-b2579	2.00548	0.00385867	gi|556503834|ref|NC_000913.3|	GO:0008861;GO:0006567;GO:0016829;GO:0005829	K06866	sp|Q3YYT6|GRCA_SHISS Autonomous glycyl radical cofactor OS=Shigella sonnei (strain Ss046) GN=grcA PE=3 SV=1
gene-b2441	2.39397	0.00398312	gi|556503834|ref|NC_000913.3|	GO:0006520;GO:0008851;GO:0046336;GO:0005829;GO:0009350	K03735	sp|P0AEJ6|EUTB_ECOLI Ethanolamine ammonia-lyase heavy chain OS=Escherichia coli (strain K12) GN=eutB PE=1 SV=1
gene-b4464	2.18487	0.00425083	gi|556503834|ref|NC_000913.3|	GO:0016021;GO:0055085;GO:0005215	K06901	sp|Q46817|YGFQ_ECOLI Putative permease YgfQ OS=Escherichia coli (strain K12) GN=ygfQ PE=3 SV=2
gene-b4036	1.98565	0.00437985	gi|556503834|ref|NC_000913.3|	GO:0055085;GO:0046718;GO:0001618;GO:0045203;GO:0006811;GO:0015481;GO:0042958;GO:0005515;GO:0015768;GO:0046930;GO:0006974;GO:0042956	K02024	sp|P02943|LAMB_ECOLI Maltoporin OS=Escherichia coli (strain K12) GN=lamB PE=1 SV=1
gene-b1073	2.81067	0.00456226	gi|556503834|ref|NC_000913.3|	GO:0030694;GO:0071978;GO:0009424	K02387	sp|P0ABX1|FLGB_SHIFL Flagellar basal body rod protein FlgB OS=Shigella flexneri GN=flgB PE=3 SV=2
gene-b2724	3.81037	0.00672095	gi|556503834|ref|NC_000913.3|	GO:0046872;GO:0009061;GO:0009375;GO:0009055;GO:0008901;GO:0051539;GO:0016829;GO:0016020	K15827	sp|P0AAK3|HYCB_SHIFL Formate hydrogenlyase subunit 2 OS=Shigella flexneri GN=hycB PE=3 SV=1
gene-b2461	3.39132	0.00741523	gi|556503834|ref|NC_000913.3|	GO:0005524;GO:0046336	K04029	sp|P76556|EUTP_ECOLI Ethanolamine utilization protein EutP OS=Escherichia coli (strain K12) GN=eutP PE=3 SV=1
gene-b2111	1.83042	0.0080561	gi|556503834|ref|NC_000913.3|	GO:0007155;GO:0009289	-	sp|P33343|YEHD_ECOLI Uncharacterized protein YehD OS=Escherichia coli (strain K12) GN=yehD PE=4 SV=1
gene-b0973	2.05017	0.00833869	gi|556503834|ref|NC_000913.3|	GO:0016151;GO:0009061;GO:0033748;GO:0005886;GO:0009055;GO:0005515;GO:0008901;GO:0006113;GO:0016829;GO:0030288;GO:0044569	K06281	sp|P0ACD9|MBHL_SHIFL Hydrogenase-1 large chain OS=Shigella flexneri GN=hyaB PE=3 SV=1
gene-b1492	2.95949	0.00912113	gi|556503834|ref|NC_000913.3|	GO:0009405;GO:0005887;GO:1902475;GO:0051454;GO:0015179;GO:0015297	K20265	sp|P63236|GADC_SHIFL Probable glutamate/gamma-aminobutyrate antiporter OS=Shigella flexneri GN=gadC PE=3 SV=1
gene-b3513	2.74704	0.0105382	gi|556503834|ref|NC_000913.3|	GO:0046677;GO:0005886;GO:0055085	K18898	sp|P37636|MDTE_ECOLI Multidrug resistance protein MdtE OS=Escherichia coli (strain K12) GN=mdtE PE=1 SV=1
gene-b1800	1.9033	0.0114045	gi|556503834|ref|NC_000913.3|	GO:0005737;GO:0009027;GO:0051287;GO:0006108;GO:0000287;GO:0046553;GO:0003862;GO:0050319;GO:0055114	K07246	sp|P76251|DMLA_ECOLI D-malate dehydrogenase [decarboxylating] OS=Escherichia coli (strain K12) GN=dmlA PE=1 SV=1
gene-b0978	2.47659	0.0128043	gi|556503834|ref|NC_000913.3|	GO:0016682;GO:0016021;GO:0046872;GO:0019646;GO:0009055;GO:0070069;GO:0006119;GO:0005886	K00425	sp|P26459|APPC_ECOLI Cytochrome bd-II oxidase subunit 1 OS=Escherichia coli (strain K12) GN=appC PE=1 SV=1
gene-b0823	2.13952	0.0132245	gi|556503834|ref|NC_000913.3|	GO:0005975;GO:0005829;GO:0008861;GO:0016829	K00656	sp|P75793|PFLF_ECOLI Putative formate acetyltransferase 3 OS=Escherichia coli (strain K12) GN=ybiW PE=3 SV=1
gene-b0178	1.71386	0.0136501	gi|556503834|ref|NC_000913.3|	GO:0005829;GO:0030288;GO:0051085;GO:0022417;GO:0050821;GO:0003677;GO:0032978;GO:0001530;GO:0065002;GO:0051082;GO:0043165	K06142	sp|Q3Z5I0|SKP_SHISS Chaperone protein Skp OS=Shigella sonnei (strain Ss046) GN=skp PE=3 SV=1
gene-b1433	2.80921	0.0140258	gi|556503834|ref|NC_000913.3|	GO:0016021;GO:0042925;GO:0042919;GO:0005886;GO:0055085;GO:0022857	K05782	sp|P76103|YDCO_ECOLI Inner membrane protein YdcO OS=Escherichia coli (strain K12) GN=ydcO PE=1 SV=2
gene-b3110	2.54744	0.0146206	gi|556503834|ref|NC_000913.3|	GO:0016021;GO:0006810;GO:0005886	-	sp|P42628|YHAO_ECOLI Inner membrane transport protein YhaO OS=Escherichia coli (strain K12) GN=yhaO PE=1 SV=3
gene-b4110	3.98847	0.0158168	gi|556503834|ref|NC_000913.3|	-	-	sp|P39267|YJCZ_ECOLI Uncharacterized protein YjcZ OS=Escherichia coli (strain K12) GN=yjcZ PE=4 SV=2
gene-b2453	2.52672	0.01659	gi|556503834|ref|NC_000913.3|	GO:0046872;GO:0004022;GO:0046336;GO:0055114	K04022	sp|P76553|EUTG_ECOLI Ethanolamine utilization protein EutG OS=Escherichia coli (strain K12) GN=eutG PE=1 SV=2
gene-b2720	3.84546	0.0166875	gi|556503834|ref|NC_000913.3|	GO:0046872;GO:0009375;GO:0051539;GO:0055114;GO:0008901;GO:0016829;GO:0003954	K15831	sp|P16432|HYCF_ECOLI Formate hydrogenlyase subunit 6 OS=Escherichia coli (strain K12) GN=hycF PE=4 SV=1
gene-b2460	3.96575	0.0169666	gi|556503834|ref|NC_000913.3|	GO:0005515;GO:0046336	K04030	sp|P76555|EUTQ_ECOLI Ethanolamine utilization protein EutQ OS=Escherichia coli (strain K12) GN=eutQ PE=4 SV=1
gene-b1075	2.26646	0.0206122	gi|556503834|ref|NC_000913.3|	-	K02389	sp|P75936|FLGD_ECOLI Basal-body rod modification protein FlgD OS=Escherichia coli (strain K12) GN=flgD PE=3 SV=1
gene-b2874	1.61796	0.0212847	gi|556503834|ref|NC_000913.3|	GO:0006525;GO:0016310;GO:0008804	K00926	sp|Q46807|ARCL_ECOLI Carbamate kinase-like protein YqeA OS=Escherichia coli (strain K12) GN=yqeA PE=3 SV=1
gene-b2440	2.46568	0.0214851	gi|556503834|ref|NC_000913.3|	GO:0031419;GO:0006520;GO:0008851;GO:0046336;GO:0009350	K03736	sp|Q1R8T1|EUTC_ECOUT Ethanolamine ammonia-lyase light chain OS=Escherichia coli (strain UTI89 / UPEC) GN=eutC PE=3 SV=1
gene-b3225	1.8606	0.0216388	gi|556503834|ref|NC_000913.3|	GO:0042802;GO:0019262;GO:0005975;GO:0008747;GO:0005829	K01639	sp|Q3YX23|NANA_SHISS N-acetylneuraminate lyase OS=Shigella sonnei (strain Ss046) GN=nanA PE=3 SV=1
gene-b2110	1.6567	0.022244	gi|556503834|ref|NC_000913.3|	GO:0061077;GO:0043711;GO:0071555;GO:0044183;GO:0030288	-	sp|P33342|YEHC_ECOLI Uncharacterized fimbrial chaperone YehC OS=Escherichia coli (strain K12) GN=yehC PE=3 SV=1
gene-b3001	1.63922	0.0222517	gi|556503834|ref|NC_000913.3|	GO:0009438;GO:0055114;GO:0016616;GO:0006974	K19265	sp|Q46851|GPR_ECOLI L-glyceraldehyde 3-phosphate reductase OS=Escherichia coli (strain K12) GN=gpr PE=1 SV=1
gene-b4470	1.96645	0.023038	gi|556503834|ref|NC_000913.3|	-	-	sp|P42626|YHAM_ECOLI UPF0597 protein YhaM OS=Escherichia coli (strain K12) GN=yhaM PE=3 SV=3
gene-b0030	1.75571	0.0236714	gi|556503834|ref|NC_000913.3|	GO:0006144;GO:0045437;GO:0047622;GO:0006974;GO:0006152;GO:0042454;GO:0047724;GO:0005829;GO:0006206	K12700	sp|P22564|RIHC_ECOLI Non-specific ribonucleoside hydrolase RihC OS=Escherichia coli (strain K12) GN=rihC PE=1 SV=1
gene-b3480	2.88026	0.024615	gi|556503834|ref|NC_000913.3|	GO:0016151;GO:0072511;GO:0015413;GO:0035444;GO:0043190;GO:0005524;GO:0008152;GO:0006974	K10824	sp|P33594|NIKE_ECOLI Nickel import ATP-binding protein NikE OS=Escherichia coli (strain K12) GN=nikE PE=3 SV=2
gene-b1634	1.54928	0.0258853	gi|556503834|ref|NC_000913.3|	GO:0015078;GO:0035443;GO:1902600;GO:0071916;GO:0005887;GO:0015333;GO:0042895;GO:0042937;GO:0042891;GO:0035442;GO:0015031	K03305	sp|P77304|DTPA_ECOLI Dipeptide and tripeptide permease A OS=Escherichia coli (strain K12) GN=dtpA PE=1 SV=1
gene-b3496	1.55167	0.026242	gi|556503834|ref|NC_000913.3|	GO:0015078;GO:0035443;GO:1902600;GO:0071916;GO:0005887;GO:0015333;GO:0042895;GO:0042937;GO:0042891;GO:0035442;GO:0016787;GO:0015031	K03305	sp|P36837|DTPB_ECOLI Dipeptide and tripeptide permease B OS=Escherichia coli (strain K12) GN=dtpB PE=1 SV=2
gene-b2722	4.3104	0.0267922	gi|556503834|ref|NC_000913.3|	GO:0009375;GO:0005887;GO:0055114;GO:0050136;GO:0016829	K15829	sp|P16430|HYCD_ECOLI Formate hydrogenlyase subunit 4 OS=Escherichia coli (strain K12) GN=hycD PE=1 SV=1
gene-b2456	4.70272	0.0295611	gi|556503834|ref|NC_000913.3|	GO:0006974;GO:0005515;GO:0046336	K04028	sp|P0AEJ8|EUTN_ECOLI Ethanolamine utilization protein EutN OS=Escherichia coli (strain K12) GN=eutN PE=1 SV=1
gene-b2802	1.62753	0.0312548	gi|556503834|ref|NC_000913.3|	GO:0042802;GO:0008790;GO:0030145;GO:0042355;GO:0019571;GO:0008736;GO:0005829	K01818	sp|P69923|FUCI_SHIFL L-fucose isomerase OS=Shigella flexneri GN=fucI PE=3 SV=1
gene-b1590	1.54292	0.0315871	gi|556503834|ref|NC_000913.3|	GO:0016021;GO:0016491;GO:0019645	K07312	sp|P76173|YNFH_ECOLI Anaerobic dimethyl sulfoxide reductase chain YnfH OS=Escherichia coli (strain K12) GN=ynfH PE=3 SV=1
gene-b0113	1.47346	0.0319259	gi|556503834|ref|NC_000913.3|	GO:0045893;GO:0055114;GO:0003677;GO:0004148;GO:0045892;GO:0003700	K05799	sp|P0ACL9|PDHR_ECOLI Pyruvate dehydrogenase complex repressor OS=Escherichia coli (strain K12) GN=pdhR PE=1 SV=1
gene-b3224	2.52831	0.034147	gi|556503834|ref|NC_000913.3|	GO:0005887;GO:0005351;GO:0034219;GO:0015992;GO:0015538;GO:0015739	K03290	sp|P41036|NANT_ECOLI Putative sialic acid transporter OS=Escherichia coli (strain K12) GN=nanT PE=1 SV=2
gene-b3079	3.02089	0.0365854	gi|556503834|ref|NC_000913.3|	-	-	sp|P42591|YGJJ_ECOLI Uncharacterized protein YgjJ OS=Escherichia coli (strain K12) GN=ygjJ PE=4 SV=1
gene-b2883	1.44332	0.0371727	gi|556503834|ref|NC_000913.3|	GO:0018756;GO:0008892;GO:0005829;GO:0008270;GO:0006147	K01487	sp|P76641|GUAD_ECOLI Guanine deaminase OS=Escherichia coli (strain K12) GN=guaD PE=1 SV=1
gene-b2452	2.68237	0.0386717	gi|556503834|ref|NC_000913.3|	GO:0034229;GO:0016021;GO:0034228	K04023	sp|P76552|EUTH_ECOLI Ethanolamine utilization protein EutH OS=Escherichia coli (strain K12) GN=eutH PE=3 SV=1
gene-b3371	1.47112	0.0392344	gi|556503834|ref|NC_000913.3|	GO:0016787;GO:0030246;GO:0005975;GO:0016853	K10708	sp|P0AC01|FRLB_SHIFL Fructoselysine 6-phosphate deglycase OS=Shigella flexneri GN=frlB PE=3 SV=1
gene-b2878	1.39548	0.0409456	gi|556503834|ref|NC_000913.3|	GO:0005737;GO:0006537;GO:0005506;GO:0033797;GO:0051539;GO:0004355;GO:0055114	K12527	sp|Q46811|YGFK_ECOLI Uncharacterized protein YgfK OS=Escherichia coli (strain K12) GN=ygfK PE=4 SV=1
gene-b1654	1.58632	0.0421052	gi|556503834|ref|NC_000913.3|	GO:0046872;GO:0009055;GO:0005515;GO:0045454;GO:0051537;GO:0005829;GO:0015035;GO:0055114	K07390	sp|P0AC72|GLRX4_SHIFL Glutaredoxin-4 OS=Shigella flexneri GN=grxD PE=3 SV=1
gene-b2866	1.36838	0.0462339	gi|556503834|ref|NC_000913.3|	GO:0005829;GO:0006166;GO:0055114;GO:0009114;GO:0046872;GO:0016903;GO:0004855;GO:0004854;GO:0043546;GO:0050660;GO:0009115	K00087	sp|Q46799|XDHA_ECOLI Xanthine dehydrogenase molybdenum-binding subunit OS=Escherichia coli (strain K12) GN=xdhA PE=2 SV=1
gene-b3077	2.61526	0.0463932	gi|556503834|ref|NC_000913.3|	GO:0004565;GO:0008152	K12112	sp|P0AC73|EBGC_ECOLI Evolved beta-galactosidase subunit beta OS=Escherichia coli (strain K12) GN=ebgC PE=1 SV=1
gene-b0979	2.17713	0.0488325	gi|556503834|ref|NC_000913.3|	GO:0016682;GO:0016021;GO:0046872;GO:0019646;GO:0009055;GO:0070069;GO:0006119;GO:0005886	K00426	sp|P26458|APPB_ECOLI Cytochrome bd-II oxidase subunit 2 OS=Escherichia coli (strain K12) GN=appB PE=1 SV=2
gene-b2432	1.44612	0.0490071	gi|556503834|ref|NC_000913.3|	-	-	sp|P76537|YFEY_ECOLI Uncharacterized protein YfeY OS=Escherichia coli (strain K12) GN=yfeY PE=1 SV=1
gene-b0783	1.85293	0.049394	gi|556503834|ref|NC_000913.3|	GO:0005829;GO:0006777;GO:0061597	K03637	sp|P0A741|MOAC_SHIFL Cyclic pyranopterin monophosphate synthase accessory protein OS=Shigella flexneri GN=moaC PE=3 SV=2
gene-b3468	1.92003	0.0496241	gi|556503834|ref|NC_000913.3|	GO:0016021	-	sp|P0ADJ2|YHHN_SHIFL Uncharacterized membrane protein YhhN OS=Shigella flexneri GN=yhhN PE=3 SV=1
