# Supplementary material for: Exposure to Veterinary Antibiotics via Food Chain Disrupts Gut Microbiota and Drives Increased Escherichia coli Virulence and Drug Resistance in Young Adults
Source: Pathogens. 2022 Sep 18;11(9):1062. doi: 10.3390/pathogens11091062 (PMC9500718; doi:10.3390/pathogens11091062)
Supplement: Supplementary file 1 [file pathogens-11-01062-s001.zip › Table S4 down-regulated genes.xlsx]

## Sheet: Sheet1
id	fold Change	p val	Chromosome	GO	KEGG	NR Description
gene-b4119	-22.6656	1.31916e-08	gi|556503834|ref|NC_000913.3|	GO:0052692;GO:0030145;GO:0005995;GO:0005515;GO:0070403;GO:0016616;GO:0005829;GO:0055114	K07406	sp|P06720|AGAL_ECOLI Alpha-galactosidase OS=Escherichia coli (strain K12) GN=melA PE=1 SV=1
gene-b3686	-22.8169	3.08136e-07	gi|556503834|ref|NC_000913.3|	GO:0005737;GO:0050821	K04081	sp|P0C060|IBPB_SHIFL Small heat shock protein IbpB OS=Shigella flexneri GN=ibpB PE=3 SV=1
gene-b4120	-13.2683	1.68282e-06	gi|556503834|ref|NC_000913.3|	GO:0005887;GO:0034219;GO:0043887;GO:0015765;GO:0005515;GO:0015769;GO:0015592;GO:0035725	K11104	sp|P02921|MELB_ECOLI Melibiose carrier protein OS=Escherichia coli (strain K12) GN=melB PE=1 SV=2
gene-b1743	-10.2202	8.04837e-06	gi|556503834|ref|NC_000913.3|	GO:0042597	K06006	sp|P77754|SPY_ECOLI Spheroplast protein Y OS=Escherichia coli (strain K12) GN=spy PE=1 SV=1
gene-b3502	-138.704	1.5008e-05	gi|556503834|ref|NC_000913.3|	GO:0042960;GO:0005887;GO:0016491;GO:0015700;GO:0008490;GO:0015699;GO:0046685;GO:0055114	K03893	sp|P0AB95|ARSB_SHIFL Arsenical pump membrane protein OS=Shigella flexneri GN=arsB PE=3 SV=1
gene-b1535	-9.25184	1.62404e-05	gi|556503834|ref|NC_000913.3|	GO:0052621;GO:0043709;GO:0008270;GO:0051271;GO:1902209;GO:0008152;GO:0005525	K13069	sp|P31129|YDEH_ECOLI Diguanylate cyclase YdeH OS=Escherichia coli (strain K12) GN=ydeH PE=1 SV=2
gene-b1304	-8.69646	1.6349e-05	gi|556503834|ref|NC_000913.3|	GO:0005829;GO:0005543;GO:0042802;GO:0009408;GO:0060187;GO:0043433;GO:0009271;GO:0031234	K03969	sp|P0AFM8|PSPA_SHIFL Phage shock protein A OS=Shigella flexneri GN=pspA PE=3 SV=2
gene-b1283	-10.4834	1.6605e-05	gi|556503834|ref|NC_000913.3|	GO:0019867;GO:0005886	K04062	sp|P0ADB0|OSMB_SHIFL Osmotically-inducible lipoprotein B OS=Shigella flexneri GN=osmB PE=3 SV=1
gene-b4006	-8.65214	1.87694e-05	gi|556503834|ref|NC_000913.3|	GO:0004643;GO:0005829;GO:0003937;GO:0006189	K00602	sp|P15639|PUR9_ECOLI Bifunctional purine biosynthesis protein PurH OS=Escherichia coli (strain K12) GN=purH PE=1 SV=1
gene-b2499	-8.20295	4.06124e-05	gi|556503834|ref|NC_000913.3|	GO:0005829;GO:0005524;GO:0004641;GO:0006189	K01933	sp|P08178|PUR5_ECOLI Phosphoribosylformylglycinamidine cyclo-ligase OS=Escherichia coli (strain K12) GN=purM PE=1 SV=3
gene-b4114	-15.8461	5.49498e-05	gi|556503834|ref|NC_000913.3|	GO:0009103;GO:0009245;GO:0016021;GO:0046677;GO:0016776;GO:0051301;GO:0008484;GO:0005886	K03760	sp|P30845|EPTA_ECOLI Phosphoethanolamine transferase EptA OS=Escherichia coli (strain K12) GN=eptA PE=1 SV=2
gene-b1849	-8.98819	8.51663e-05	gi|556503834|ref|NC_000913.3|	GO:0005829;GO:0004639;GO:0004638;GO:0005524;GO:0005515;GO:0000287;GO:0046084;GO:0016310;GO:0008776;GO:0043815;GO:0004644;GO:0006189	K08289	sp|Q3Z2K0|PURT_SHISS Phosphoribosylglycinamide formyltransferase 2 OS=Shigella sonnei (strain Ss046) GN=purT PE=3 SV=1
gene-b4015	-6.56992	0.000142258	gi|556503834|ref|NC_000913.3|	GO:0046872;GO:0006099;GO:0046912;GO:0005829;GO:0004451;GO:0006097	K01637	sp|P0A9G6|ACEA_ECOLI Isocitrate lyase OS=Escherichia coli (strain K12) GN=aceA PE=1 SV=1
gene-b2789	-11.2654	0.000159707	gi|556503834|ref|NC_000913.3|	GO:0008514;GO:0016021;GO:0015711;GO:0005886;GO:0055085	K03535	sp|Q46916|GUDP_ECOLI Probable glucarate transporter OS=Escherichia coli (strain K12) GN=gudP PE=1 SV=1
gene-b4014	-6.48397	0.000163829	gi|556503834|ref|NC_000913.3|	GO:0005737;GO:0006099;GO:0004474;GO:0006097	K01638	sp|P08997|MASY_ECOLI Malate synthase A OS=Escherichia coli (strain K12) GN=aceB PE=1 SV=1
gene-b2557	-6.57048	0.000166974	gi|556503834|ref|NC_000913.3|	GO:0005829;GO:0046872;GO:0042623;GO:0006541;GO:0005524;GO:0006189;GO:0004642	K01952	sp|P15254|PUR4_ECOLI Phosphoribosylformylglycinamidine synthase OS=Escherichia coli (strain K12) GN=purL PE=1 SV=3
gene-b4050	-7.82547	0.000167006	gi|556503834|ref|NC_000913.3|	GO:0016021;GO:0005886;GO:0009271	-	sp|P32696|PSPG_ECOLI Phage shock protein G OS=Escherichia coli (strain K12) GN=pspG PE=1 SV=2
gene-b2252	-23.0405	0.000243902	gi|556503834|ref|NC_000913.3|	GO:0016311;GO:0016791;GO:0008653;GO:0016021;GO:0042597	-	sp|P45565|AIS_ECOLI Lipopolysaccharide core heptose(II)-phosphate phosphatase OS=Escherichia coli (strain K12) GN=ais PE=2 SV=2
gene-b1113	-6.37986	0.000264932	gi|556503834|ref|NC_000913.3|	GO:0016755;GO:0016807;GO:0008360;GO:0071555;GO:0018104;GO:0043164;GO:0006508;GO:0042597;GO:0071972;GO:0016757	K19236	sp|P75954|YCFS_ECOLI Probable L,D-transpeptidase YcfS OS=Escherichia coli (strain K12) GN=ycfS PE=1 SV=1
gene-b3127	-7.65663	0.000300426	gi|556503834|ref|NC_000913.3|	-	K12299	sp|P0AA80|GARP_ECOLI Probable galactarate transporter OS=Escherichia coli (strain K12) GN=garP PE=1 SV=1
gene-b2312	-6.08984	0.000315314	gi|556503834|ref|NC_000913.3|	GO:0005829;GO:0009113;GO:0006541;GO:0042802;GO:0009116;GO:0000287;GO:0004044;GO:0006189	K00764	sp|P0AG17|PUR1_SHIFL Amidophosphoribosyltransferase OS=Shigella flexneri GN=purF PE=3 SV=2
gene-b3503	-15.0339	0.000318248	gi|556503834|ref|NC_000913.3|	GO:0008794;GO:0055114;GO:0006974;GO:0046685	K00537	sp|P0AB97|ARSC_SHIFL Arsenate reductase OS=Shigella flexneri GN=arsC PE=3 SV=1
gene-b1601	-9.92341	0.000326306	gi|556503834|ref|NC_000913.3|	-	K11744	sp|P0AFS6|TQSA_SHIFL AI-2 transport protein TqsA OS=Shigella flexneri GN=tqsA PE=3 SV=1
gene-b0523	-9.59212	0.000363534	gi|556503834|ref|NC_000913.3|	GO:0005829;GO:0004638;GO:0034023;GO:0006189	K01588	sp|P0AG18|PURE_ECOLI N5-carboxyaminoimidazole ribonucleotide mutase OS=Escherichia coli (strain K12) GN=purE PE=1 SV=2
gene-b1586	-6.23227	0.000433254	gi|556503834|ref|NC_000913.3|	-	-	sp|P76172|YNFD_ECOLI Uncharacterized protein YnfD OS=Escherichia coli (strain K12) GN=ynfD PE=1 SV=2
gene-b3654	-11.36	0.000444256	gi|556503834|ref|NC_000913.3|	GO:0042907;GO:0005887;GO:0055085;GO:0042906	K16345	sp|P0AGN2|XANP_SHIFL Xanthine permease XanP OS=Shigella flexneri GN=xanP PE=3 SV=1
gene-b1110	-6.90027	0.000594207	gi|556503834|ref|NC_000913.3|	GO:0019867	-	sp|P0AB37|YCFJ_SHIFL Uncharacterized protein YcfJ OS=Shigella flexneri GN=ycfJ PE=4 SV=1
gene-b1023	-6.05453	0.000676088	gi|556503834|ref|NC_000913.3|	GO:0098732;GO:0016798;GO:0016810;GO:0044010;GO:0031246;GO:0045493	K11931	sp|P75906|PGAB_ECOLI Poly-beta-1,6-N-acetyl-D-glucosamine N-deacetylase OS=Escherichia coli (strain K12) GN=pgaB PE=1 SV=1
gene-b1024	-5.51768	0.000717686	gi|556503834|ref|NC_000913.3|	GO:0016021;GO:0022891;GO:0009279;GO:0044010;GO:0055085	K11935	sp|P69434|PGAA_ECOLI Poly-beta-1,6-N-acetyl-D-glucosamine export protein OS=Escherichia coli (strain K12) GN=pgaA PE=1 SV=1
gene-b1846	-4.97535	0.00127894	gi|556503834|ref|NC_000913.3|	GO:0016021;GO:0005886	-	sp|P33218|YEBE_ECOLI Inner membrane protein YebE OS=Escherichia coli (strain K12) GN=yebE PE=1 SV=2
gene-b4005	-4.97675	0.0013467	gi|556503834|ref|NC_000913.3|	GO:0009113;GO:0030145;GO:0042623;GO:0005524;GO:0004637;GO:0000287;GO:0006974;GO:0006189	K01945	sp|P15640|PUR2_ECOLI Phosphoribosylamine--glycine ligase OS=Escherichia coli (strain K12) GN=purD PE=1 SV=2
gene-b2602	-6.96975	0.00141344	gi|556503834|ref|NC_000913.3|	-	-	sp|P11289|YFIL_ECOLI Uncharacterized protein YfiL OS=Escherichia coli (strain K12) GN=yfiL PE=4 SV=3
gene-b1216	-5.23105	0.00180942	gi|556503834|ref|NC_000913.3|	GO:0015385;GO:0015386;GO:0006883;GO:0035725;GO:0005887;GO:0071805;GO:0030007	K07300	sp|P31801|CHAA_ECOLI Sodium/proton antiporter ChaA OS=Escherichia coli (strain K12) GN=chaA PE=1 SV=1
gene-b2313	-6.42304	0.00232261	gi|556503834|ref|NC_000913.3|	GO:0016021;GO:0005886;GO:0009403	K03558	sp|P08550|CVPA_ECOLI Colicin V production protein OS=Escherichia coli (strain K12) GN=cvpA PE=1 SV=1
gene-b2476	-4.44501	0.00241175	gi|556503834|ref|NC_000913.3|	GO:0005829;GO:0004639;GO:0004638;GO:0005524;GO:0046084;GO:0016020;GO:0006189	K01923	sp|P0A7E0|PUR7_SHIFL Phosphoribosylaminoimidazole-succinocarboxamide synthase OS=Shigella flexneri GN=purC PE=3 SV=1
gene-b3049	-5.14825	0.00246619	gi|556503834|ref|NC_000913.3|	GO:1900232;GO:1902201;GO:0010676;GO:0005978	K22720	sp|Q3YXJ3|GLGS_SHISS Glycogen synthesis protein GlgS OS=Shigella sonnei (strain Ss046) GN=glgS PE=3 SV=1
gene-b3687	-4.85808	0.00271301	gi|556503834|ref|NC_000913.3|	GO:0005829;GO:0050821;GO:0042802;GO:0009408	K04080	sp|Q3YWC5|IBPA_SHISS Small heat shock protein IbpA OS=Shigella sonnei (strain Ss046) GN=ibpA PE=3 SV=1
gene-b2289	-4.44694	0.00280535	gi|556503834|ref|NC_000913.3|	GO:0045893;GO:0000986;GO:0045892;GO:0003700	-	sp|P36771|LRHA_ECOLI Probable HTH-type transcriptional regulator LrhA OS=Escherichia coli (strain K12) GN=lrhA PE=4 SV=2
gene-b0836	-4.20396	0.00298039	gi|556503834|ref|NC_000913.3|	GO:0010468;GO:1900190	K19688	sp|P0AAY3|BSSR_SHIFL Biofilm regulator BssR OS=Shigella flexneri GN=bssR PE=3 SV=1
gene-b4090	-4.8625	0.00319802	gi|556503834|ref|NC_000913.3|	GO:0008786;GO:0006098;GO:0004751;GO:0019316	K01808	sp|P37351|RPIB_ECOLI Ribose-5-phosphate isomerase B OS=Escherichia coli (strain K12) GN=rpiB PE=1 SV=2
gene-b4016	-4.89926	0.00348072	gi|556503834|ref|NC_000913.3|	GO:0018105;GO:0006097;GO:0006470;GO:0004674;GO:0008772;GO:0006099;GO:0005524;GO:0004722;GO:0006006;GO:0016208;GO:0050790;GO:0005737;GO:0101014	K00906	sp|P11071|ACEK_ECOLI Isocitrate dehydrogenase kinase/phosphatase OS=Escherichia coli (strain K12) GN=aceK PE=1 SV=2
gene-b4087	-4.94764	0.00359994	gi|556503834|ref|NC_000913.3|	GO:0055085;GO:0015439;GO:0015886;GO:0103115;GO:0042882;GO:0005524;GO:0015612;GO:0008152;GO:0005886	K10551	sp|P32721|ALSA_ECOLI D-allose import ATP-binding protein AlsA OS=Escherichia coli (strain K12) GN=alsA PE=3 SV=2
gene-b4484	-4.04255	0.00399937	gi|556503834|ref|NC_000913.3|	GO:0030288;GO:0042802;GO:0030162;GO:0051082;GO:0045892	K06006	sp|P0AE87|CPXP_SHIFL Periplasmic protein CpxP OS=Shigella flexneri GN=cpxP PE=3 SV=1
gene-b0032	-4.54184	0.00433713	gi|556503834|ref|NC_000913.3|	GO:0005829;GO:0005951;GO:0004088;GO:0006526;GO:0044205;GO:0006541;GO:0000050;GO:0005524;GO:0016740;GO:0005515;GO:0006207	K01956	sp|P0A6F1|CARA_ECOLI Carbamoyl-phosphate synthase small chain OS=Escherichia coli (strain K12) GN=carA PE=1 SV=1
gene-b1436	-16.2627	0.00439483	gi|556503834|ref|NC_000913.3|	-	-	sp|P64459|YNCJ_ECOLI Uncharacterized protein YncJ OS=Escherichia coli (strain K12) GN=yncJ PE=4 SV=1
gene-b1306	-6.54094	0.00510049	gi|556503834|ref|NC_000913.3|	GO:0006355;GO:0003677;GO:0005886;GO:0016021	K03973	sp|P0AFN5|PSPC_SHIFL Phage shock protein C OS=Shigella flexneri GN=pspC PE=3 SV=1
gene-b1785	-12.3651	0.00525174	gi|556503834|ref|NC_000913.3|	GO:1902201;GO:0005886;GO:0016021	-	sp|P76236|YEAI_ECOLI Inner membrane protein YeaI OS=Escherichia coli (strain K12) GN=yeaI PE=1 SV=1
gene-b3364	-3.86933	0.00626026	gi|556503834|ref|NC_000913.3|	GO:0005887;GO:0072714;GO:0055085	K06141	sp|Q1R5R8|TSGA_ECOUT Protein TsgA OS=Escherichia coli (strain UTI89 / UPEC) GN=tsgA PE=3 SV=1
gene-b0837	-4.42718	0.00629287	gi|556503834|ref|NC_000913.3|	GO:0005975;GO:0070968;GO:0016901;GO:0005509;GO:0055114;GO:0030288	K21430	sp|P75804|YLII_ECOLI Soluble aldose sugar dehydrogenase YliI OS=Escherichia coli (strain K12) GN=yliI PE=1 SV=1
gene-b0162	-3.91928	0.00741985	gi|556503834|ref|NC_000913.3|	GO:0045893;GO:0003677;GO:0003700	K02647	sp|P37047|CDAR_ECOLI Carbohydrate diacid regulator OS=Escherichia coli (strain K12) GN=cdaR PE=1 SV=2
gene-b0806	-5.13291	0.00755041	gi|556503834|ref|NC_000913.3|	GO:0031236;GO:0009242;GO:0042597	K13650	sp|P0AAX6|MCBA_ECOLI Uncharacterized protein McbA OS=Escherichia coli (strain K12) GN=mcbA PE=2 SV=2
gene-b3238	-5.70252	0.00822816	gi|556503834|ref|NC_000913.3|	GO:0070301;GO:0071468;GO:0044011;GO:0042597	-	sp|P64614|YHCN_ECOLI Uncharacterized protein YhcN OS=Escherichia coli (strain K12) GN=yhcN PE=3 SV=1
gene-b3126	-4.05755	0.00854627	gi|556503834|ref|NC_000913.3|	GO:0005737;GO:0046392;GO:0042838;GO:0000287;GO:0008672	K01630	sp|P23522|GARL_ECOLI 5-keto-4-deoxy-D-glucarate aldolase OS=Escherichia coli (strain K12) GN=garL PE=1 SV=2
gene-b2255	-4.22466	0.00909029	gi|556503834|ref|NC_000913.3|	-	K10011	sp|P77398|ARNA_ECOLI Bifunctional polymyxin resistance protein ArnA OS=Escherichia coli (strain K12) GN=arnA PE=1 SV=1
gene-b1188	-3.74491	0.0106019	gi|556503834|ref|NC_000913.3|	GO:0006974	-	sp|P29013|YCGB_ECOLI Uncharacterized protein YcgB OS=Escherichia coli (strain K12) GN=ycgB PE=4 SV=2
gene-b3615	-6.302	0.011331	gi|556503834|ref|NC_000913.3|	GO:0016020;GO:0008152;GO:0015020;GO:0016036	K19354	sp|P11290|YIBD_ECOLI Uncharacterized glycosyltransferase YibD OS=Escherichia coli (strain K12) GN=yibD PE=3 SV=2
gene-b2253	-4.6999	0.0119785	gi|556503834|ref|NC_000913.3|	GO:0009103;GO:0009245;GO:0046677;GO:0008483;GO:0099621;GO:0005737;GO:0030170	K07806	sp|P77690|ARNB_ECOLI UDP-4-amino-4-deoxy-L-arabinose--oxoglutarate aminotransferase OS=Escherichia coli (strain K12) GN=arnB PE=1 SV=2
gene-b3124	-3.66223	0.012299	gi|556503834|ref|NC_000913.3|	GO:0046392;GO:0031388;GO:0042838;GO:0043798;GO:0005524;GO:0008887	K00865	sp|P23524|GLXK1_ECOLI Glycerate 2-kinase OS=Escherichia coli (strain K12) GN=garK PE=1 SV=2
gene-b0522	-3.5914	0.0136153	gi|556503834|ref|NC_000913.3|	GO:0005829;GO:0034028;GO:0046872;GO:0004639;GO:0004638;GO:0005524;GO:0046084;GO:0006189	K01589	sp|P09029|PURK_ECOLI N5-carboxyaminoimidazole ribonucleotide synthase OS=Escherichia coli (strain K12) GN=purK PE=1 SV=2
gene-b2592	-3.20853	0.0148644	gi|556503834|ref|NC_000913.3|	GO:0042802;GO:0008233;GO:0016485;GO:0006986;GO:0005524;GO:0016020;GO:0042623;GO:0005829;GO:0009408	K03695	sp|P63284|CLPB_ECOLI Chaperone protein ClpB OS=Escherichia coli (strain K12) GN=clpB PE=1 SV=1
gene-b0953	-3.17616	0.015644	gi|556503834|ref|NC_000913.3|	GO:0032055;GO:0043024;GO:0043022;GO:0005737	K03812	sp|P0AFW2|RMF_ECOLI Ribosome modulation factor OS=Escherichia coli (strain K12) GN=rmf PE=1 SV=1
gene-b1784	-4.4605	0.0157598	gi|556503834|ref|NC_000913.3|	-	K09786	sp|P76235|YEAH_ECOLI UPF0229 protein YeaH OS=Escherichia coli (strain K12) GN=yeaH PE=3 SV=1
gene-b0792	-3.43802	0.0158883	gi|556503834|ref|NC_000913.3|	GO:0016787;GO:0015562;GO:0005887;GO:0006974;GO:0055085	K01992	sp|P0AFQ1|YBHR_SHIFL Inner membrane transport permease YbhR OS=Shigella flexneri GN=ybhR PE=3 SV=1
gene-b2254	-4.70948	0.0169424	gi|556503834|ref|NC_000913.3|	GO:0009103;GO:0009245;GO:0016021;GO:0046677;GO:0103019;GO:0016780;GO:0036108;GO:0005886	K10012	sp|Q3YZV2|ARNC_SHISS Undecaprenyl-phosphate 4-deoxy-4-formamido-L-arabinose transferase OS=Shigella sonnei (strain Ss046) GN=arnC PE=3 SV=1
gene-b1022	-4.3167	0.0172221	gi|556503834|ref|NC_000913.3|	GO:0008152;GO:0008375;GO:0043708;GO:0005887;GO:0005515	K11936	sp|P75905|PGAC_ECOLI Poly-beta-1,6-N-acetyl-D-glucosamine synthase OS=Escherichia coli (strain K12) GN=pgaC PE=1 SV=1
gene-b0802	-4.29688	0.0179666	gi|556503834|ref|NC_000913.3|	GO:0042597;GO:0006974	-	sp|P0AAX5|YBIJ_SHIFL Uncharacterized protein YbiJ OS=Shigella flexneri GN=ybiJ PE=3 SV=1
gene-b0461	-3.75217	0.0189532	gi|556503834|ref|NC_000913.3|	GO:0005737;GO:0044010;GO:0003677	K19162	sp|P0AAR0|TOMB_ECOLI Hha toxicity modulator TomB OS=Escherichia coli (strain K12) GN=tomB PE=1 SV=1
gene-b4088	-3.30068	0.0191325	gi|556503834|ref|NC_000913.3|	GO:0015407;GO:0015749;GO:0005886;GO:0016021;GO:0030288	K10549	sp|P39265|ALSB_ECOLI D-allose-binding periplasmic protein OS=Escherichia coli (strain K12) GN=alsB PE=1 SV=1
gene-b1843	-3.31799	0.0198418	gi|556503834|ref|NC_000913.3|	GO:0016810;GO:0016746;GO:0006807	-	sp|P76280|YOBB_ECOLI Uncharacterized protein YobB OS=Escherichia coli (strain K12) GN=yobB PE=4 SV=1
gene-b4245	-3.11047	0.021972	gi|556503834|ref|NC_000913.3|	GO:0005829;GO:0044205;GO:0006520;GO:0004070;GO:0005515;GO:0006207;GO:0016597	K00609	sp|Q3YUA6|PYRB_SHISS Aspartate carbamoyltransferase OS=Shigella sonnei (strain Ss046) GN=pyrB PE=3 SV=1
gene-b3859	-3.04153	0.0226585	gi|556503834|ref|NC_000913.3|	GO:0005737;GO:0006950;GO:0006468;GO:0005524;GO:0000287;GO:0004674	-	sp|P0C0K3|RDOA_ECOLI Protein RdoA OS=Escherichia coli (strain K12) GN=rdoA PE=1 SV=1
gene-b1021	-3.20881	0.0239882	gi|556503834|ref|NC_000913.3|	GO:0043708;GO:0005887;GO:0005515	K11937	sp|P69432|PGAD_ECOLI Biofilm PGA synthesis protein PgaD OS=Escherichia coli (strain K12) GN=pgaD PE=1 SV=1
gene-b3022	-3.81834	0.0251518	gi|556503834|ref|NC_000913.3|	GO:0090502;GO:0017148;GO:0004521;GO:0044010;GO:0009372;GO:0043488;GO:0005515;GO:2000145;GO:0045892	K13651	sp|Q46865|MQSR_ECOLI mRNA interferase MqsR OS=Escherichia coli (strain K12) GN=mqsR PE=1 SV=1
gene-b0033	-3.05287	0.0258952	gi|556503834|ref|NC_000913.3|	GO:0005829;GO:0005951;GO:0004088;GO:0006526;GO:0046872;GO:0044205;GO:0004087;GO:0000050;GO:0005524;GO:0019856;GO:0005515;GO:0016597	K01955	sp|P00968|CARB_ECOLI Carbamoyl-phosphate synthase large chain OS=Escherichia coli (strain K12) GN=carB PE=1 SV=2
gene-b0460	-3.71693	0.0272842	gi|556503834|ref|NC_000913.3|	GO:0005829;GO:2000147;GO:0006355;GO:0003677;GO:1900191;GO:0005515	K05839	sp|P0ACE6|HHA_SHIFL Hemolysin expression-modulating protein Hha OS=Shigella flexneri GN=hha PE=3 SV=1
gene-b1243	-2.83702	0.0273771	gi|556503834|ref|NC_000913.3|	GO:0015197;GO:0006857;GO:0055085;GO:0009408;GO:0030288;GO:0043190;GO:0015031	K15580	sp|P23843|OPPA_ECOLI Periplasmic oligopeptide-binding protein OS=Escherichia coli (strain K12) GN=oppA PE=1 SV=2
gene-b3501	-11.021	0.0281672	gi|556503834|ref|NC_000913.3|	GO:0006355;GO:0003700;GO:0003677;GO:0005622;GO:0046685	K03892	sp|P37309|ARSR_ECOLI Arsenical resistance operon repressor OS=Escherichia coli (strain K12) GN=arsR PE=3 SV=1
gene-b1552	-3.95528	0.0290483	gi|556503834|ref|NC_000913.3|	GO:0006355;GO:0009409;GO:0003677;GO:0005829	K03704	sp|P0A986|CSPI_ECOLI Cold shock-like protein CspI OS=Escherichia coli (strain K12) GN=cspI PE=3 SV=1
gene-b4487	-3.76328	0.0300774	gi|556503834|ref|NC_000913.3|	GO:0016021	-	sp|Q3YUQ0|YJDP_SHISS Uncharacterized protein YjdP OS=Shigella sonnei (strain Ss046) GN=yjdP PE=4 SV=1
gene-b0846	-3.04517	0.0317398	gi|556503834|ref|NC_000913.3|	GO:0006355;GO:0003677	-	sp|P75811|YBJK_ECOLI Uncharacterized HTH-type transcriptional regulator YbjK OS=Escherichia coli (strain K12) GN=ybjK PE=4 SV=3
gene-b3263	-6.11928	0.0326136	gi|556503834|ref|NC_000913.3|	-	-	sp|P64619|YHDU_ECOLI Uncharacterized protein YhdU OS=Escherichia coli (strain K12) GN=yhdU PE=4 SV=1
gene-b3544	-2.84414	0.0368855	gi|556503834|ref|NC_000913.3|	GO:0055085;GO:0042277;GO:0030288;GO:0015421;GO:0006935;GO:0043190;GO:0042938;GO:0042936;GO:0015031	K12368	sp|P23847|DPPA_ECOLI Periplasmic dipeptide transport protein OS=Escherichia coli (strain K12) GN=dppA PE=1 SV=1
gene-b3774	-2.82451	0.0400988	gi|556503834|ref|NC_000913.3|	GO:0004455;GO:0009097;GO:0009099;GO:0016853;GO:0055114	K00053	sp|P05793|ILVC_ECOLI Ketol-acid reductoisomerase OS=Escherichia coli (strain K12) GN=ilvC PE=1 SV=4
gene-b2390	-4.33161	0.0420199	gi|556503834|ref|NC_000913.3|	-	-	sp|P64544|YPEC_SHIFL Uncharacterized protein YpeC OS=Shigella flexneri GN=ypeC PE=4 SV=1
gene-b2787	-3.1547	0.0429221	gi|556503834|ref|NC_000913.3|	GO:0042838;GO:0008872;GO:0000287	K01706	sp|P0AES2|GUDD_ECOLI Glucarate dehydratase OS=Escherichia coli (strain K12) GN=gudD PE=1 SV=2
gene-b2500	-2.85668	0.0436374	gi|556503834|ref|NC_000913.3|	GO:0005829;GO:0032259;GO:0006974;GO:0008168;GO:0004644;GO:0006189	K11175	sp|P08179|PUR3_ECOLI Phosphoribosylglycinamide formyltransferase OS=Escherichia coli (strain K12) GN=purN PE=1 SV=1
gene-b1307	-7.17711	0.0482889	gi|556503834|ref|NC_000913.3|	GO:0005737;GO:0005886;GO:0009271	K03971	sp|P0AFV8|PSPD_ECOLI Phage shock protein D OS=Escherichia coli (strain K12) GN=pspD PE=2 SV=1
gene-b0281	-2.64712	0.0491266	gi|556503834|ref|NC_000913.3|	GO:0046718;GO:0003677;GO:0075713;GO:0015074;GO:0006310	-	sp|P71298|INTF_ECOLI Putative prophage CP4-6 integrase OS=Escherichia coli (strain K12) GN=intF PE=3 SV=1
