# Supplementary figures and images for: Exposure to Veterinary Antibiotics via Food Chain Disrupts Gut Microbiota and Drives Increased Escherichia coli Virulence and Drug Resistance in Young Adults
Source: MDPI journal article supplement (doi:10.3390/pathogens11091062), 2022-09-18

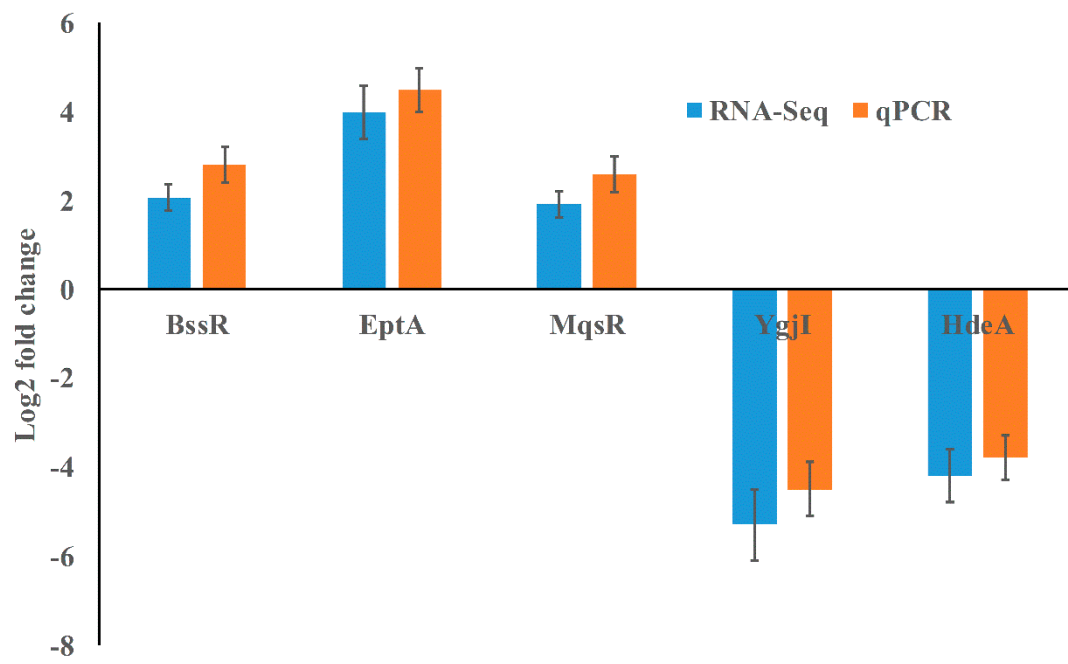

Figure S2: Comparison of qPCR result with RNA-Seq.

Supplement: s1 [file s1]

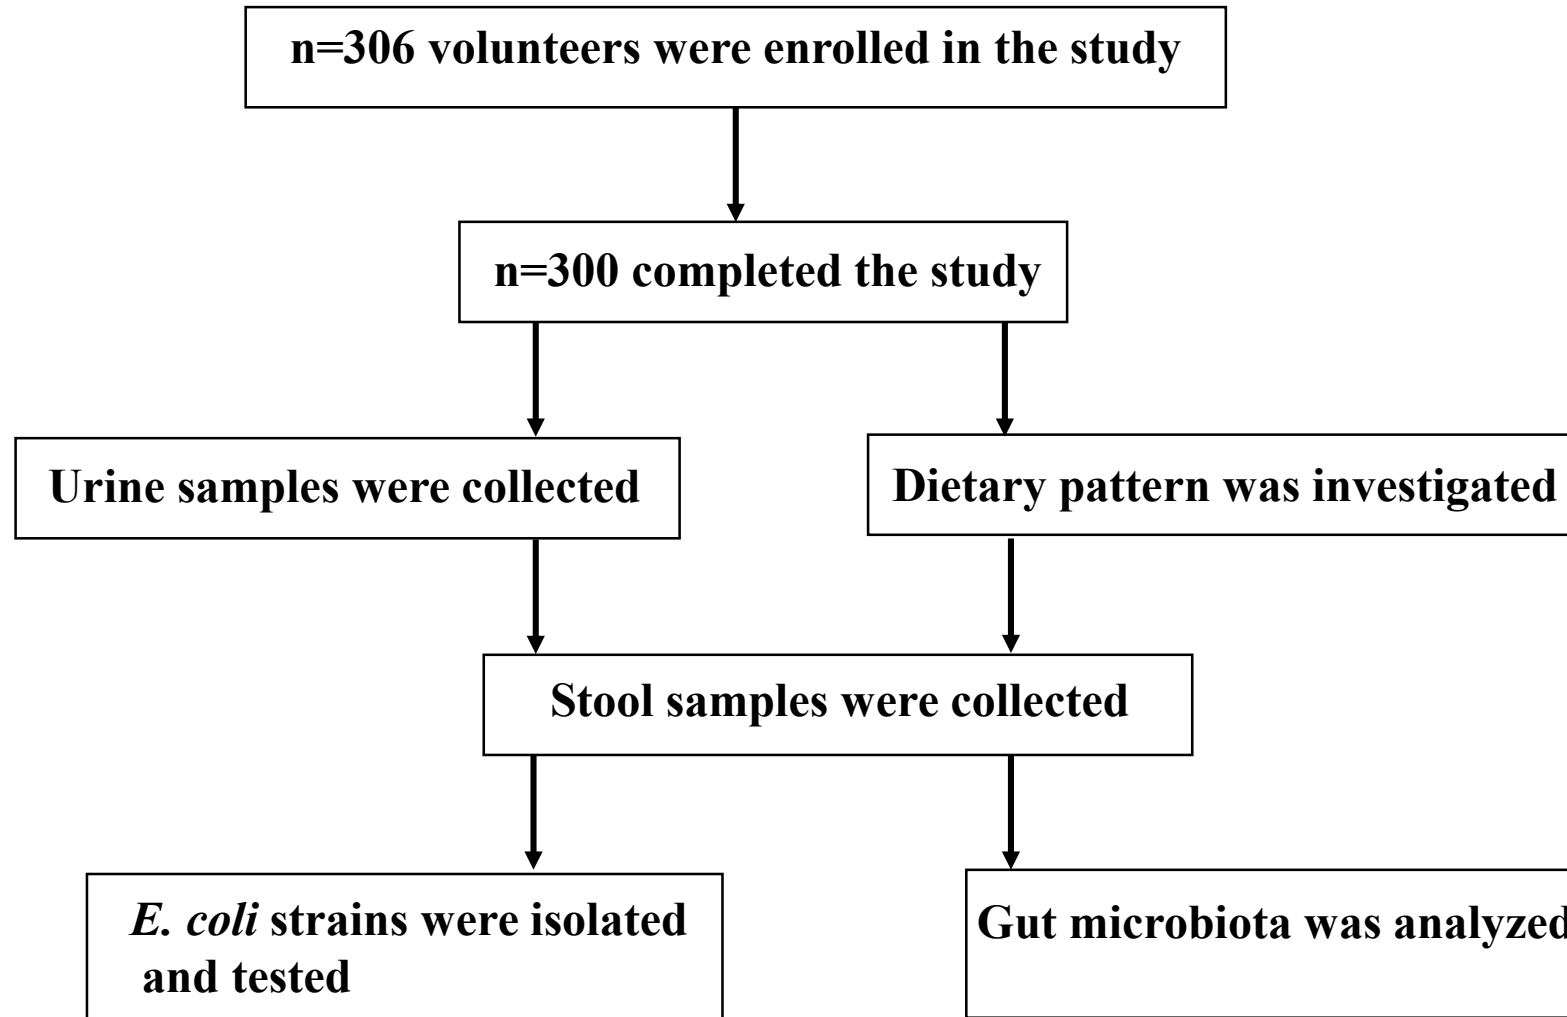

**Figure S1 The follow-up diagram of the present study**

Supplement: s1 [file s1]
